# Supplementary material for: DoGNet: A deep architecture for synapse detection in multiplexed fluorescence images
Source: PubMed Central journal article supplement (PMC6533009; doi:10.1371/journal.pcbi.1007012), 2019-05-13

## Baseline networks

**Direct network.** The direct network is a copy of Shallow DoGNet, where each element of the convolution filter is learned independently. The first convolution takes as input  $n$  channels and convolves each with five filters of size  $15 \times 15$  pixels. Next  $5n$  channels are linearly weighted and converted into two independent probability maps by a sigmoid function. To get the resulting probability map, we multiply them element-wise.

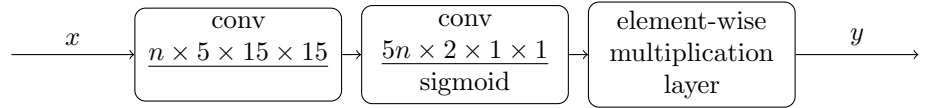

**Fully convolutional network.** Fully convolutional network (FCN) is a stacking of multiple convolutional layers with non-linearity.

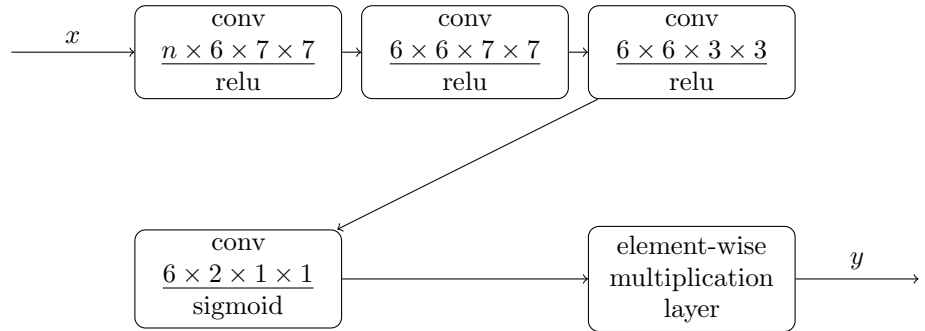

**U-net.** U-net is a standard baseline in microscopy analysis task. Do to a redundant number of parameters of the original u-net; we have implemented a minimalist version. The minimalist U-net, used in our work, was made of two scales and composed of five convolution operations.

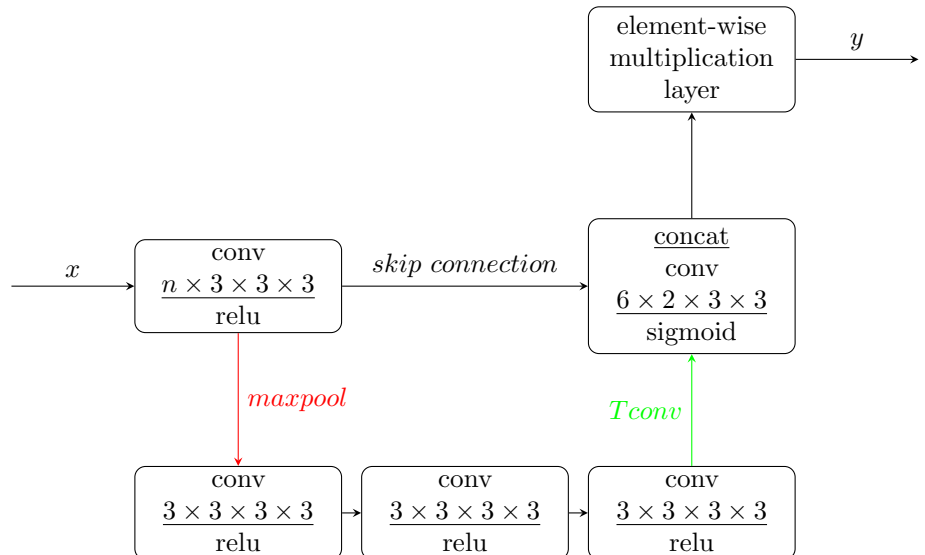

Supplement: pcbi.1007012.s001.pdf [file pcbi.1007012.s001.pdf]
